# Supplementary material for: CD36/Sirtuin 1 Axis Impairment Contributes to Hepatic Steatosis in ACE2‐Deficient Mice
Source: Hindawi journal article supplement (doi:10.1155/2016/6487509), 2016-01-01
Supplement: f1 [file 6487509.f1.pdf]

**CD36/sirtuin 1 axis impairment contributes to hepatic steatosis in ACE2-deficient mice**

Valéria Nunes-Souza<sup>1,2,3</sup>, Natalia Alenina<sup>1,3,4\*</sup>, Fatimunnisa Qadri<sup>1</sup>, Josef M Penninger<sup>5</sup>, Robson Augusto S Santos<sup>3,4</sup>, Michael Bader<sup>1,3,4,6,7</sup>, Luiza A Rabelo<sup>1,2,3\*</sup>

**Supplemental data**

**Table 1.** Primer sequences used for real time quantitative PCR.

| <b>Primers</b> | <b>Sequence Forward and Reverse (5' – 3')</b>                          |
|----------------|------------------------------------------------------------------------|
| aP2            | <b>F:</b> GTTGAGGATGGTGTCCACGTAC<br><b>R:</b> GTATGCCATGTGTGACCGGAG    |
| CD36           | <b>F:</b> CATGTAGGAAATGTGGAAGCGA<br><b>R:</b> TCTTCCAGCCAATGCCTTTG     |
| FAS            | <b>F:</b> GAGGACACTCAAGTGGCTGA<br><b>R:</b> GTGAGGTTGCTGTCGTCTGT       |
| G6Pase         | <b>F:</b> GACTGTGGGCATCAATCTCC<br><b>R:</b> ACAGGTGACAGGGAAGTCTGCT     |
| GAPDH          | <b>F:</b> CCATCACCATCTTCCAGGAG<br><b>R:</b> GTGGTTCACACCCATCACAA       |
| GCK            | <b>F:</b> GGATGCAGAAGGAGATGGAC<br><b>R:</b> GCATCACCCCTGAAGTTGGTT      |
| GLUT2          | <b>F:</b> CAGTGTCTGCTACTGCTCTTCTG<br><b>R:</b> GAGACCTTCTGCTCAGTTCGATG |
| IR             | <b>F:</b> CCACCAATACGTCATTCACAAC<br><b>R:</b> GGGCAGATGTCACAGAATCAA    |
| PCK1           | <b>F:</b> CCGTCTGGCTAAGGAGGAA<br><b>R:</b> GGGCATCAAACCTTCATCCAG       |
| PCK2           | <b>F:</b> GGCTGGAAAGTGGAGTGTGT<br><b>R:</b> AGTACACACCGCCATCACTG       |
| PPAR $\gamma$  | <b>F:</b> TCAGCTCTGTGGACCTCTCC<br><b>R:</b> ACCCTTGCATCCTTCACAAG       |

|      |                                                                  |
|------|------------------------------------------------------------------|
| UCP2 | <b>F:</b> GCATTGGCCTCTACGACTCT<br><b>R:</b> GTCCTGGTATCTCCGACCAC |
|------|------------------------------------------------------------------|

aP2: adipocyte Protein 2 (fatty acid binding protein); CD36: Cluster of Differentiation 36 (fatty acid translocase); FAS: Fatty Acid Synthase; G6Pase: Glucose 6-phosphatase; GAPDH: Glyceraldehyde 3-phosphate dehydrogenase; GCK: Glucokinase; GLUT2: Glucose transporter type 2; IR: Insulin receptor; PCK1: Phosphoenolpyruvate carboxykinase 1; PCK2: Phosphoenolpyruvate carboxykinase 2; PPAR $\gamma$ : Peroxisome proliferator-activated receptor  $\gamma$ ; UCP2: Uncoupling protein 2.
